# Supplementary material
Source: ML conference proceedings conference paper supplement (https://openaccess.thecvf.com/content/ICCV_2017/html/Collomosse_Sketching_With_Style_ICCV_2017_paper.html)

# Sketching with Style:

## Visual Search with Sketches and Aesthetic Context

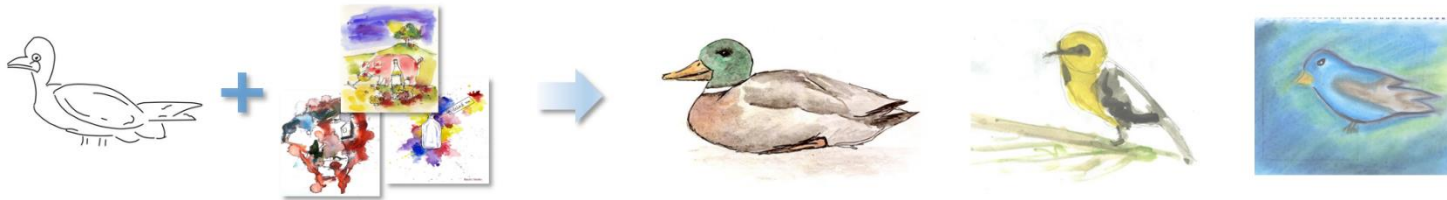

J. Collomosse

T. Bui

M. Wilber

C. Fang

H. Jin

Supplementary Results

# Retrieval Precision @ K Curves – All Baselines (Table 2)

Proposed – combined 64-D (*ss-triplet-64*)

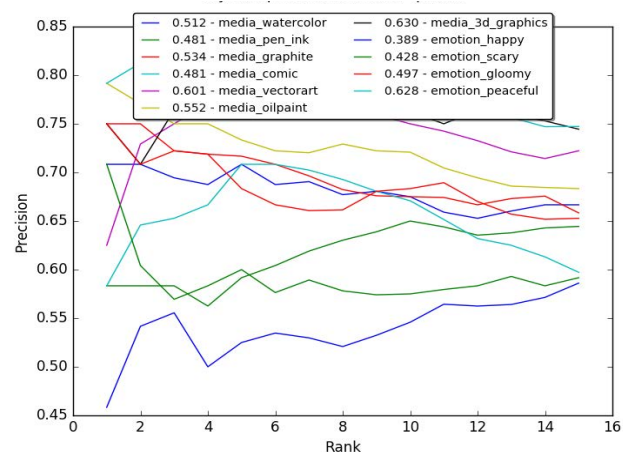

Proposed – combined 128-D (*ss-triplet-128*)

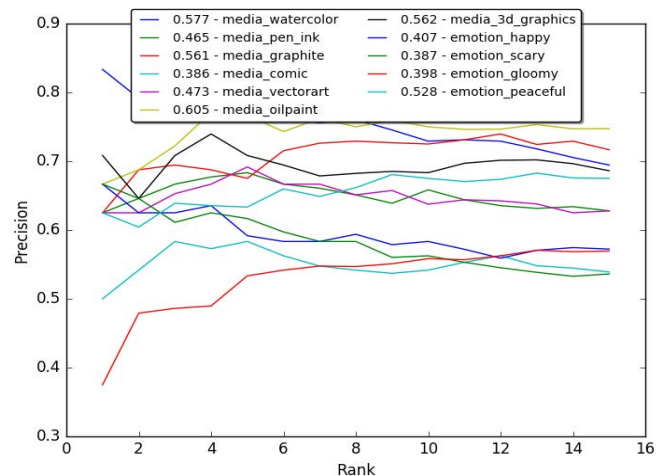

Proposed - concat only (*ss-concat*)

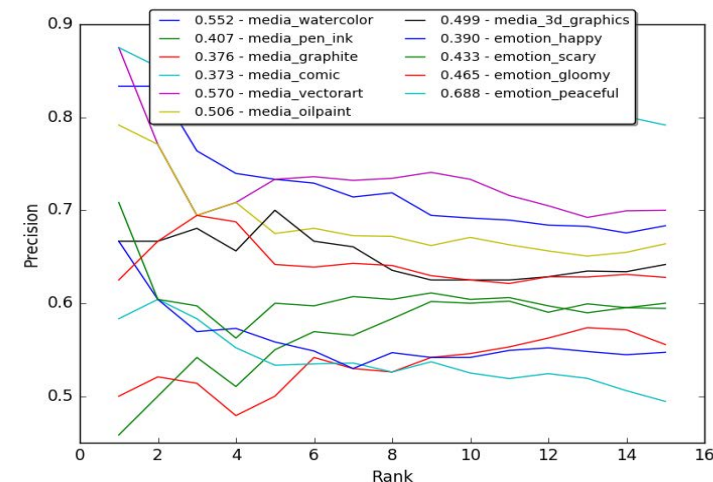

GoogLeNet [31]

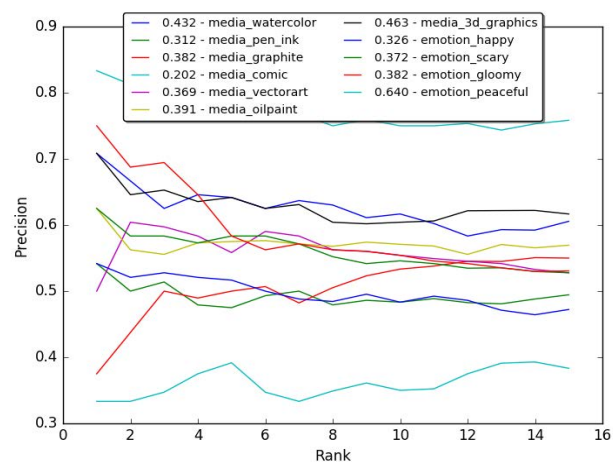

Gatys *et al.* [9]

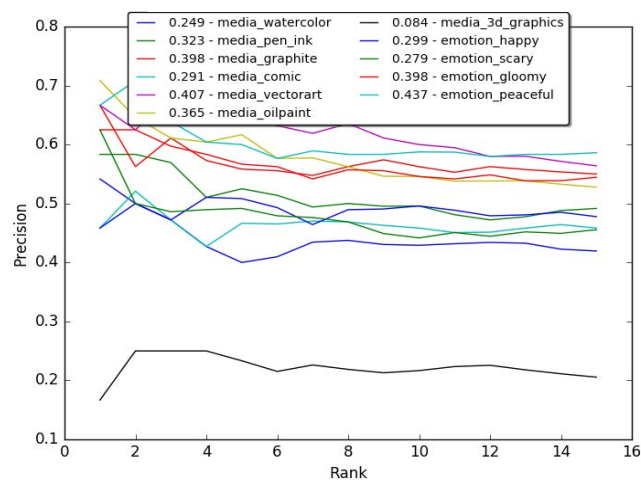

Karayev *et al.* [15]

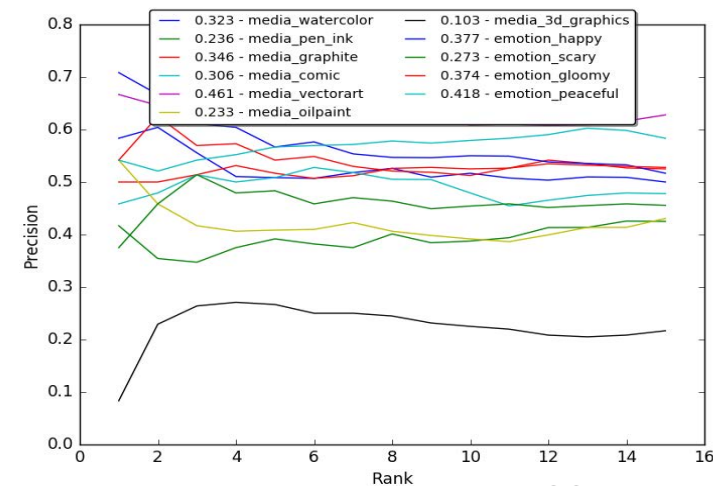

# Style Only - Retrieval Precision @ K Curves (Table 1)

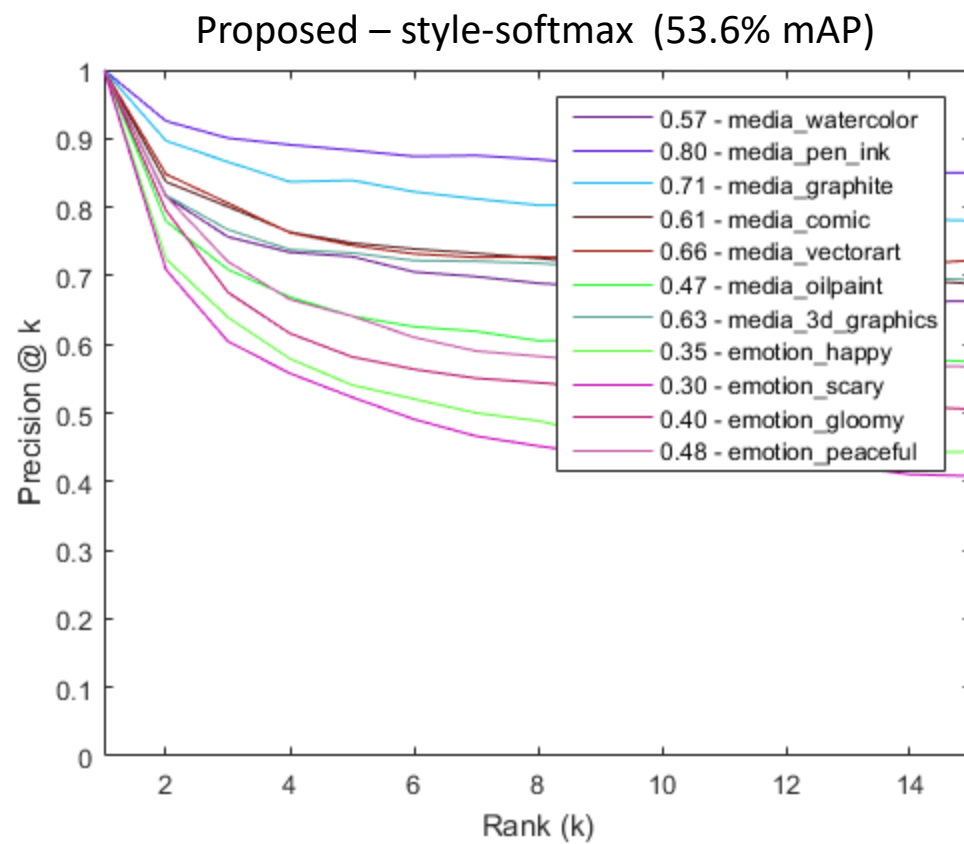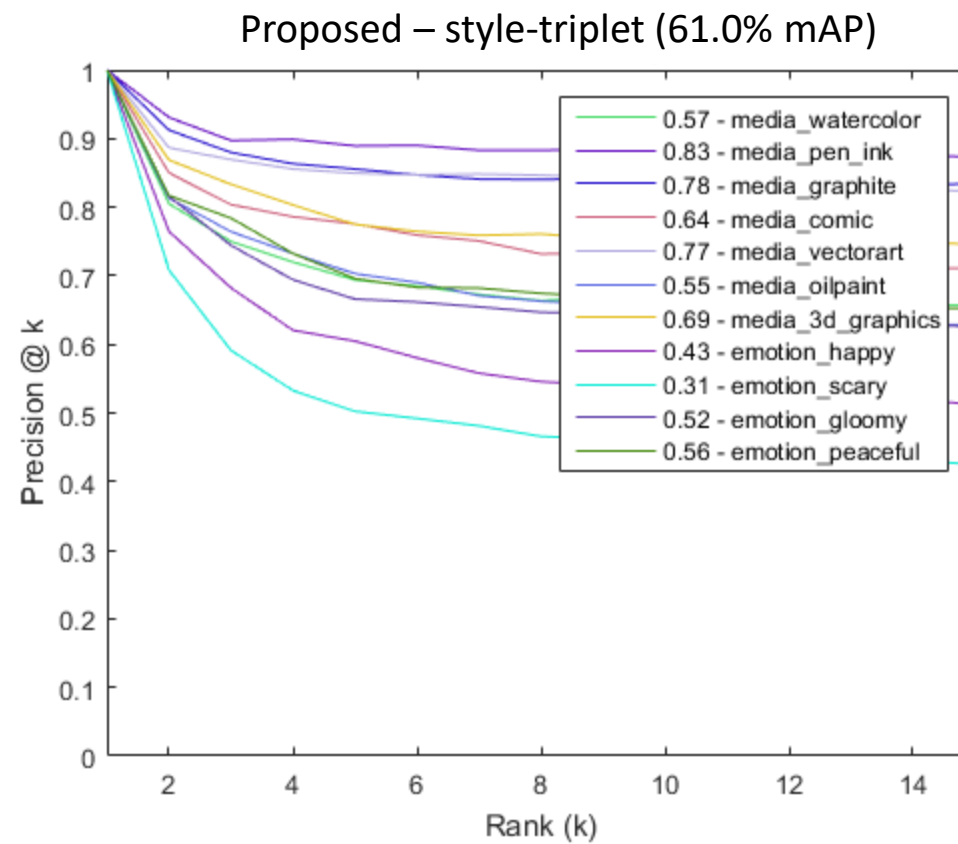

# Additional Retrieval Results (Top-1 for various queries, per Fig. 11)

| Query                                                                              | Watercolor                                                                          | Pen and Ink                                                                         | Graphite                                                                            | Comic                                                                                | Vectorart                                                                             | Oil paint                                                                             | 3D Graphics                                                                           | Happy                                                                                 | Scary                                                                                 | Gloomy                                                                                | Peaceful                                                                              |
|------------------------------------------------------------------------------------|-------------------------------------------------------------------------------------|-------------------------------------------------------------------------------------|-------------------------------------------------------------------------------------|--------------------------------------------------------------------------------------|---------------------------------------------------------------------------------------|---------------------------------------------------------------------------------------|---------------------------------------------------------------------------------------|---------------------------------------------------------------------------------------|---------------------------------------------------------------------------------------|---------------------------------------------------------------------------------------|---------------------------------------------------------------------------------------|
| 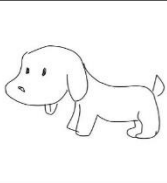   | 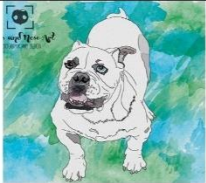   | 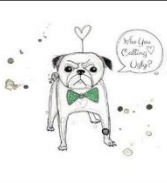   | 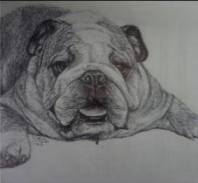   | 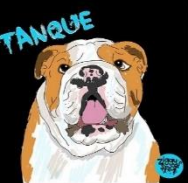   | 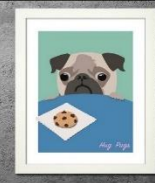   | 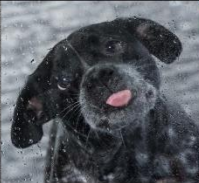   | 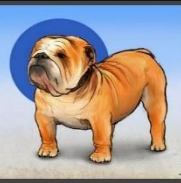   | 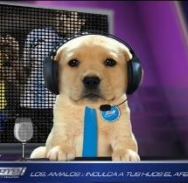   | 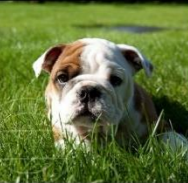   | 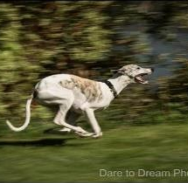   | 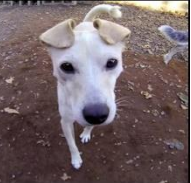   |
| 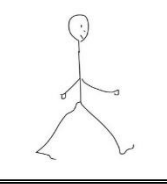   | 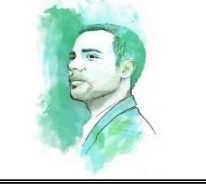   | 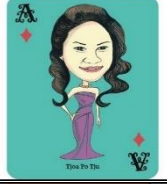   | 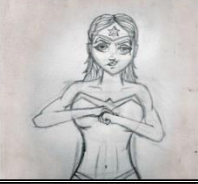   | 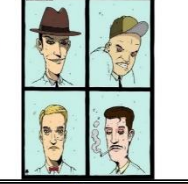   | 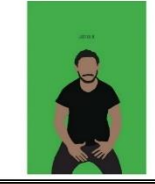   | 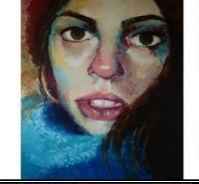   | 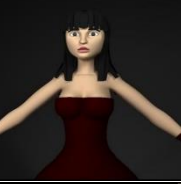   | 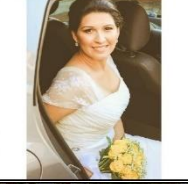   | 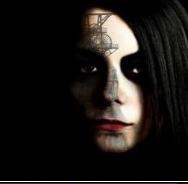   | 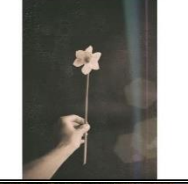   | 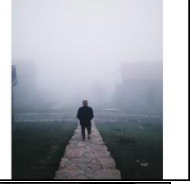   |
| 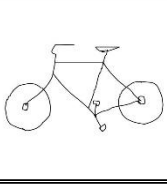   | 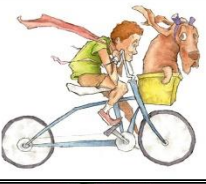   | 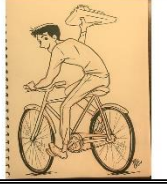   | 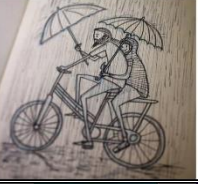   | 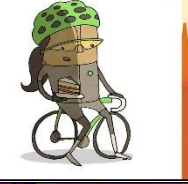   | 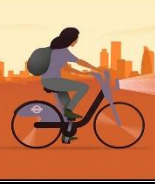   | 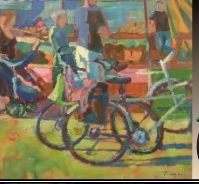   | 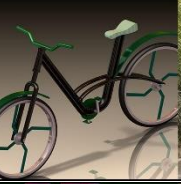   | 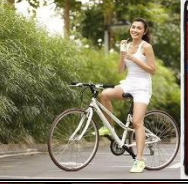   | 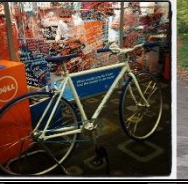   | 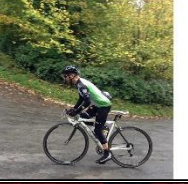   | 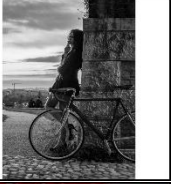   |
| 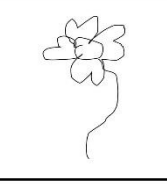   | 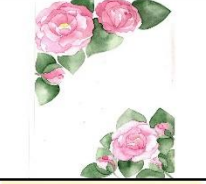   | 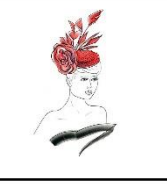   | 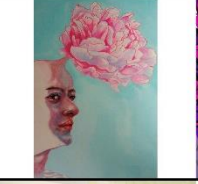   | 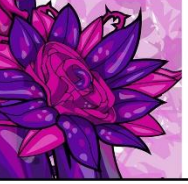   | 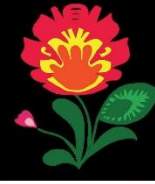   | 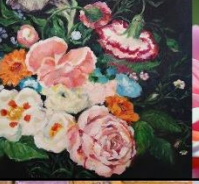   | 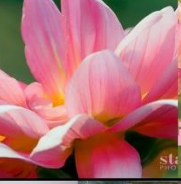   | 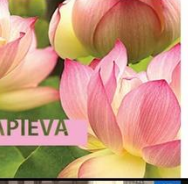   | 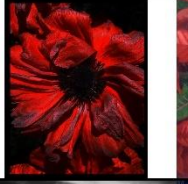   | 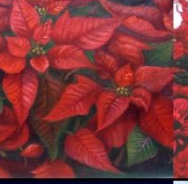   | 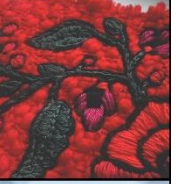   |
| 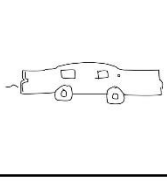 | 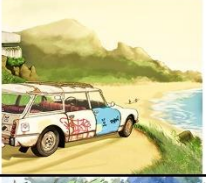 | 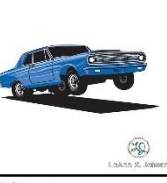 | 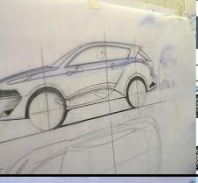 | 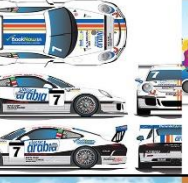 | 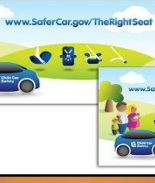 | 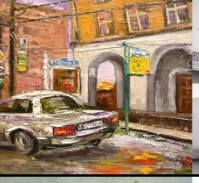 | 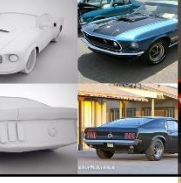 | 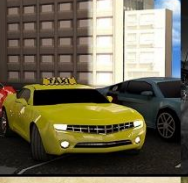 | 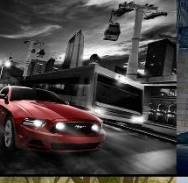 | 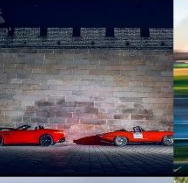 | 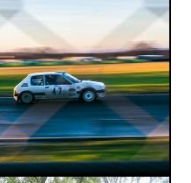 |
| 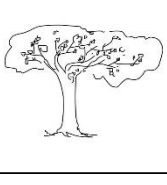 | 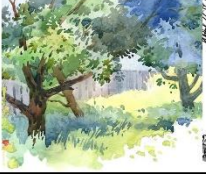 | 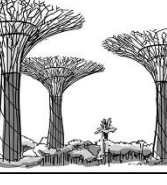 | 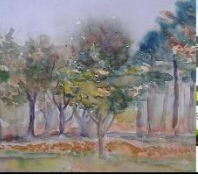 | 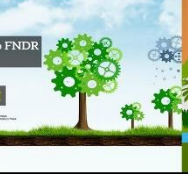 | 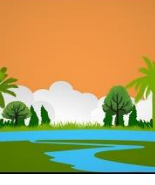 | 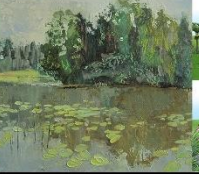 | 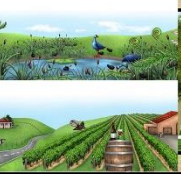 | 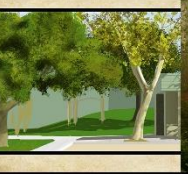 | 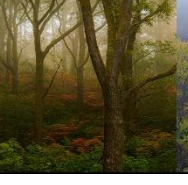 | 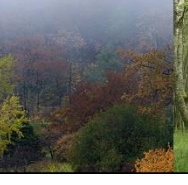 | 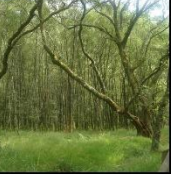 |

# Additional Retrieval Results (Top-n for constant query, per Fig. 6)

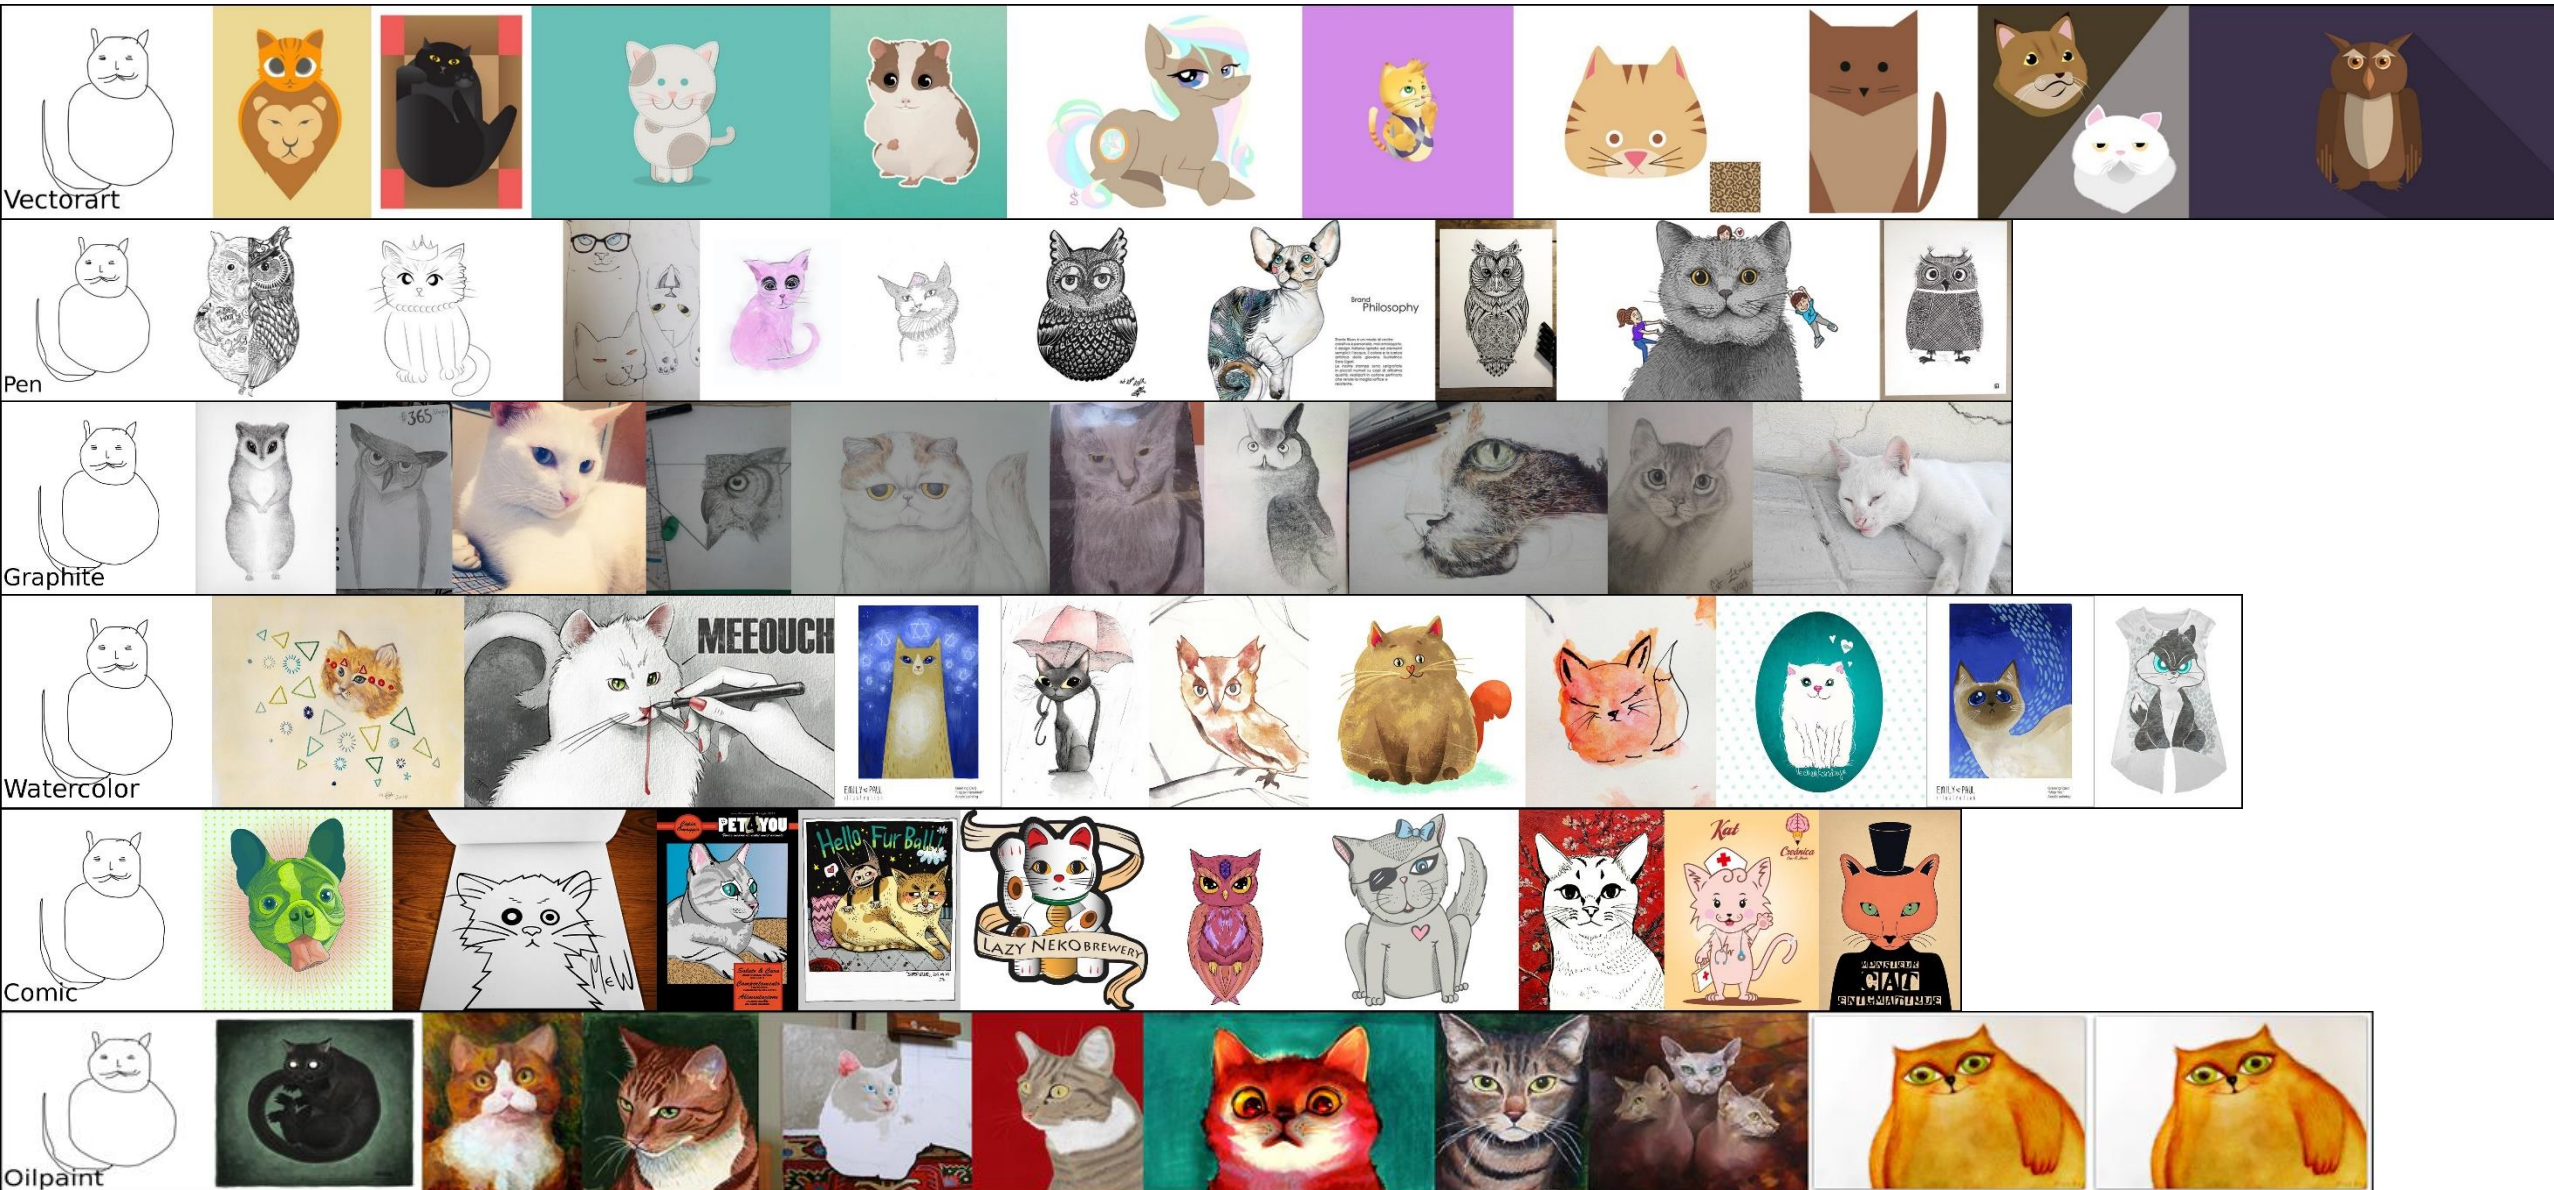

# Additional Retrieval Results (Top-n for constant query, per Fig. 6)

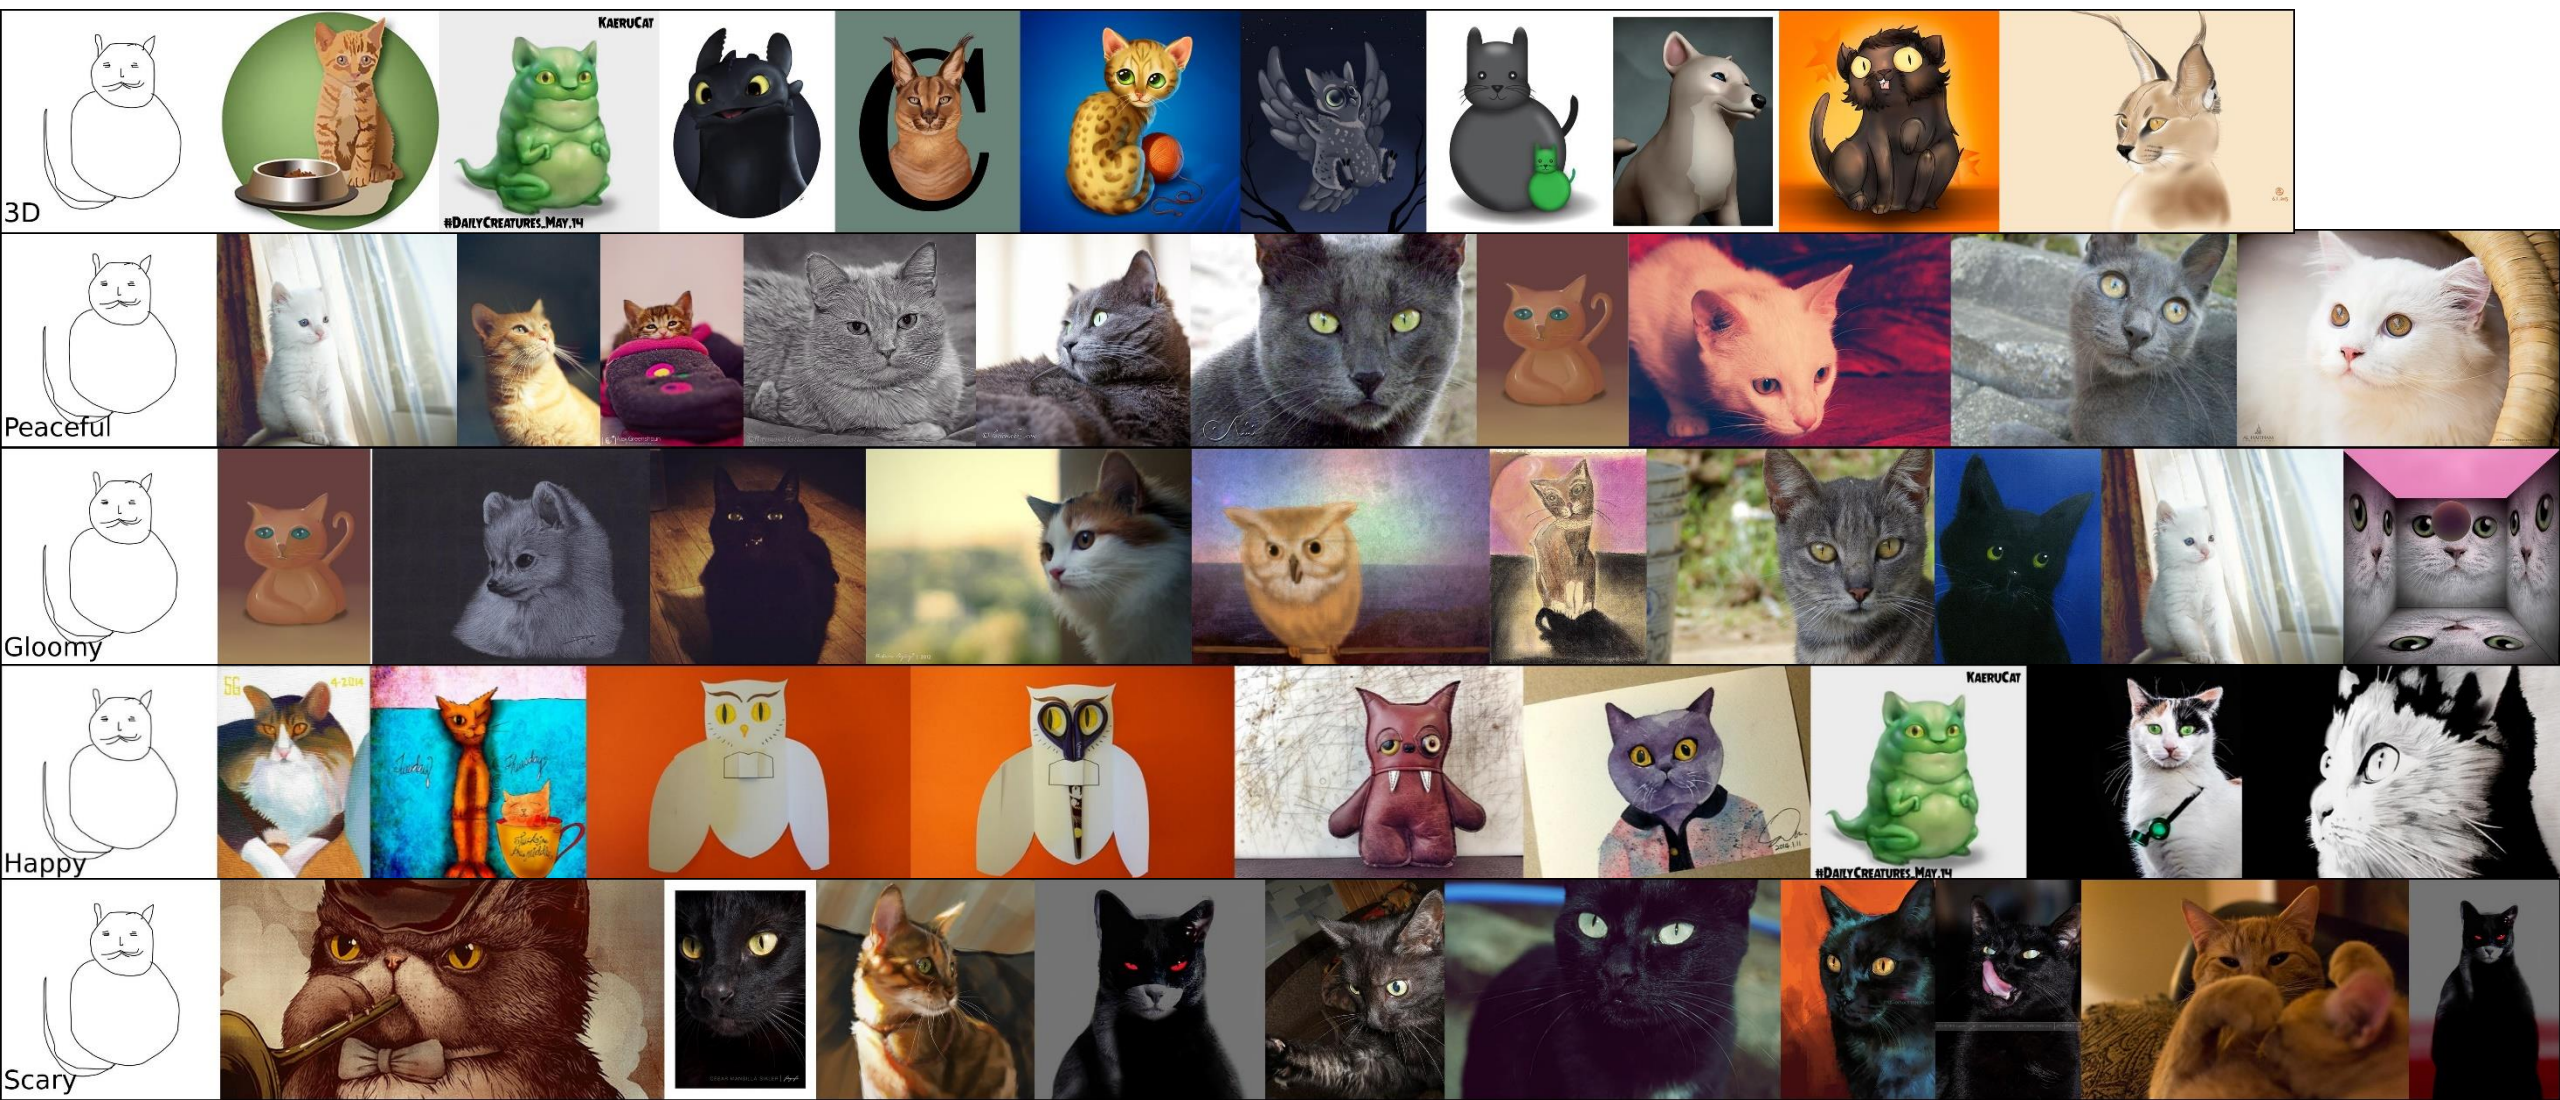

# Additional Retrieval Results (Top-n for constant query, per Fig. 6)

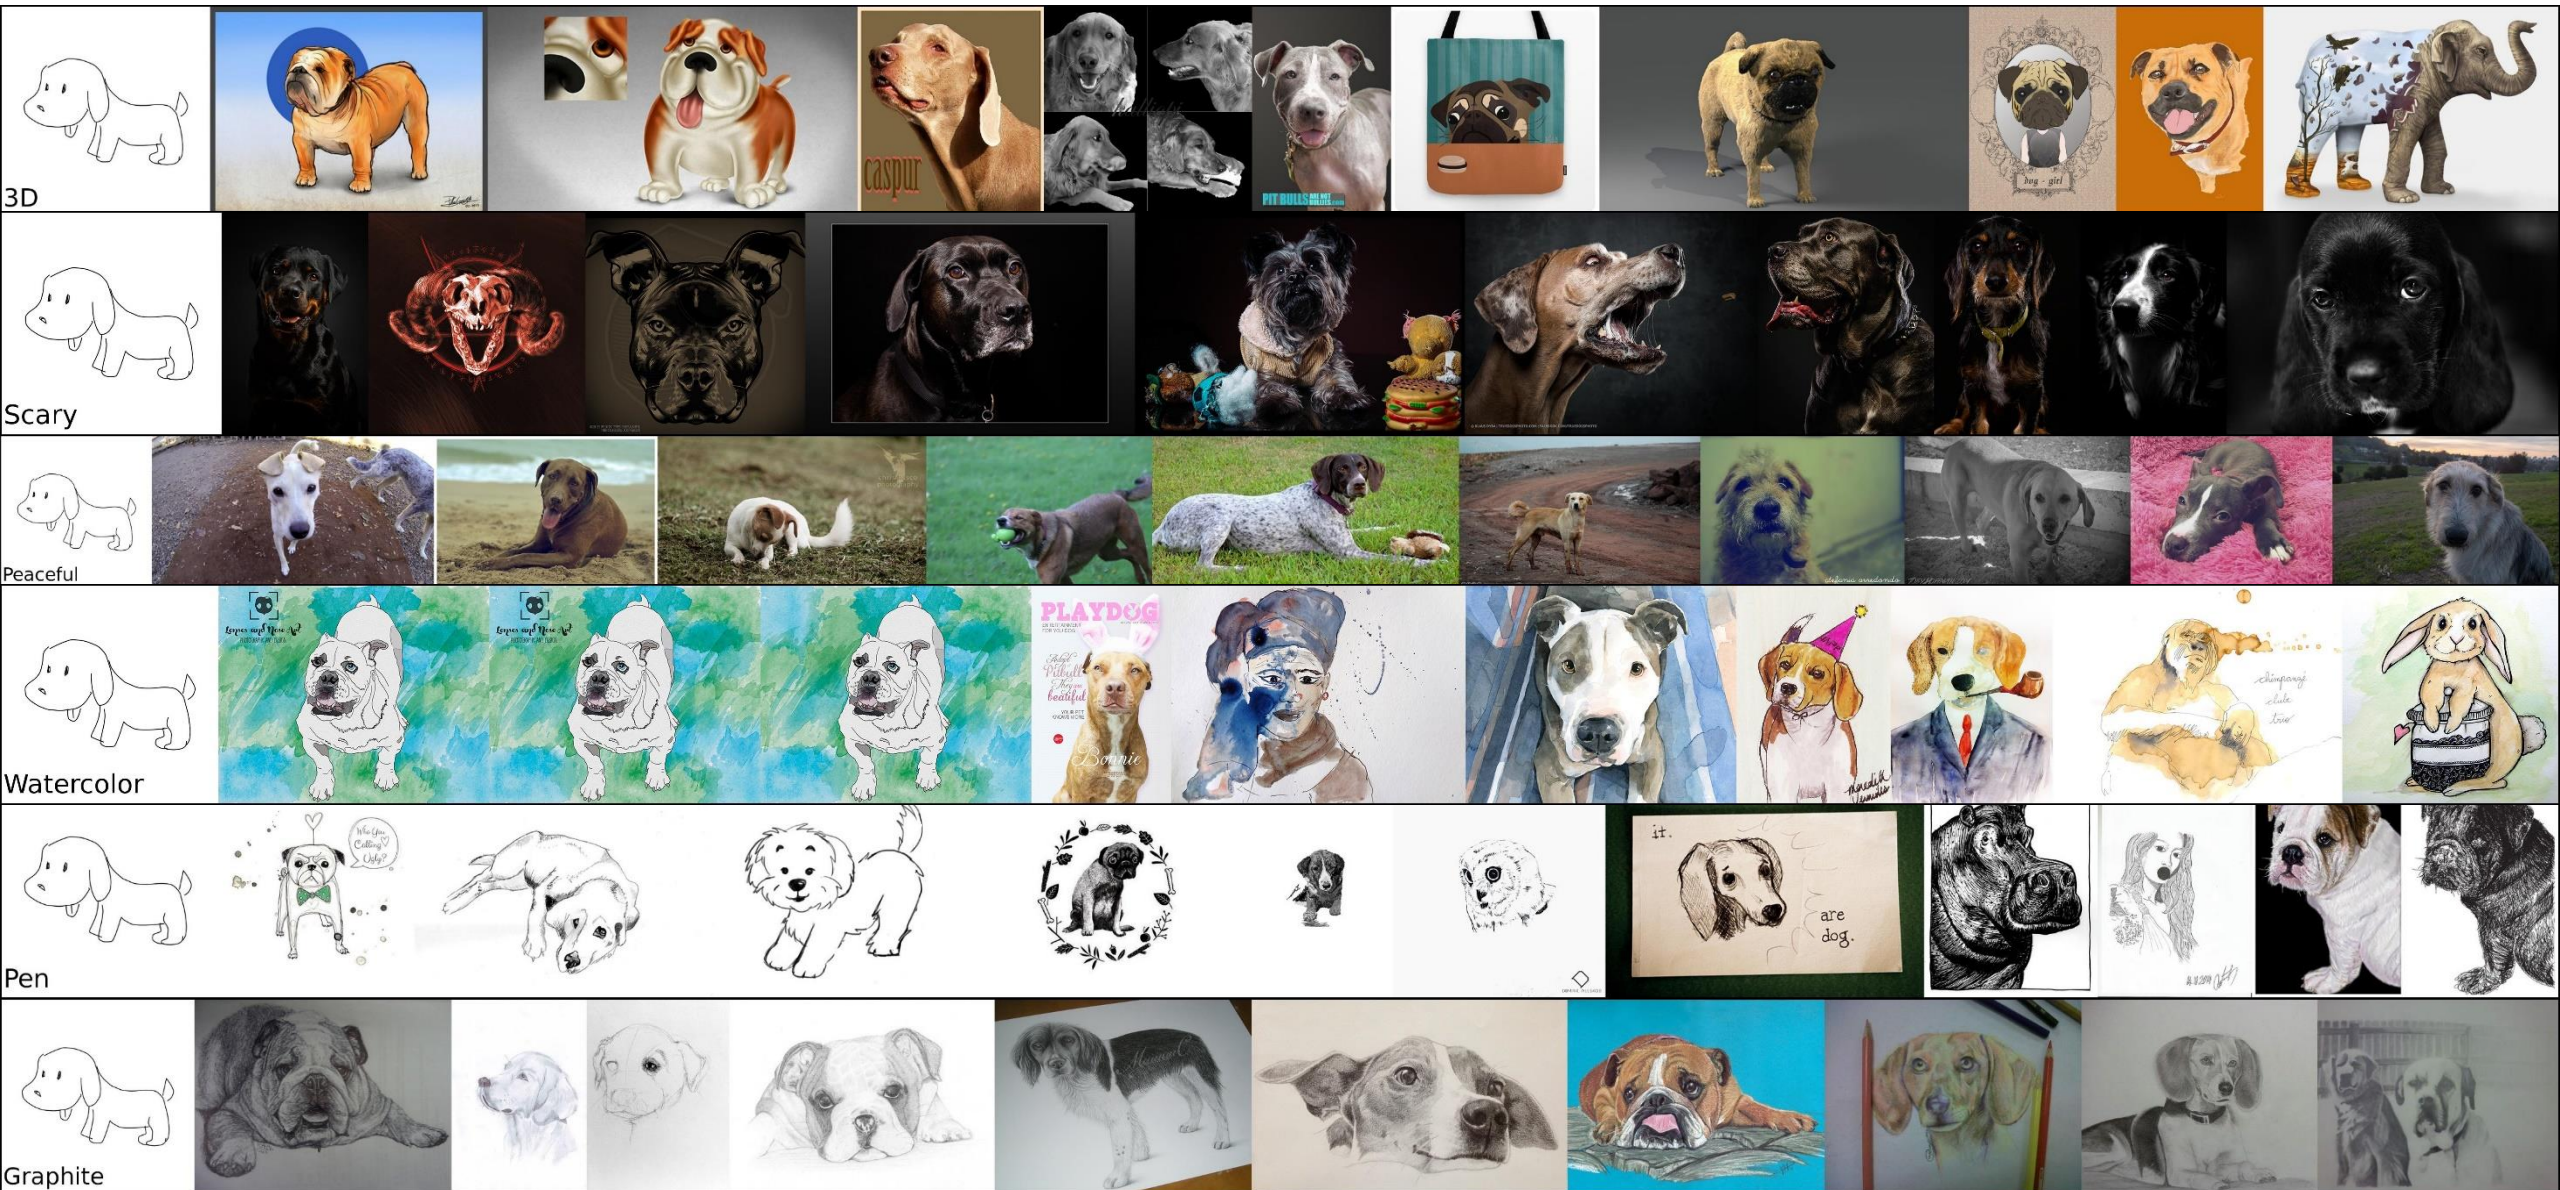

# Blended Styles (Zoomed, Figure 9)

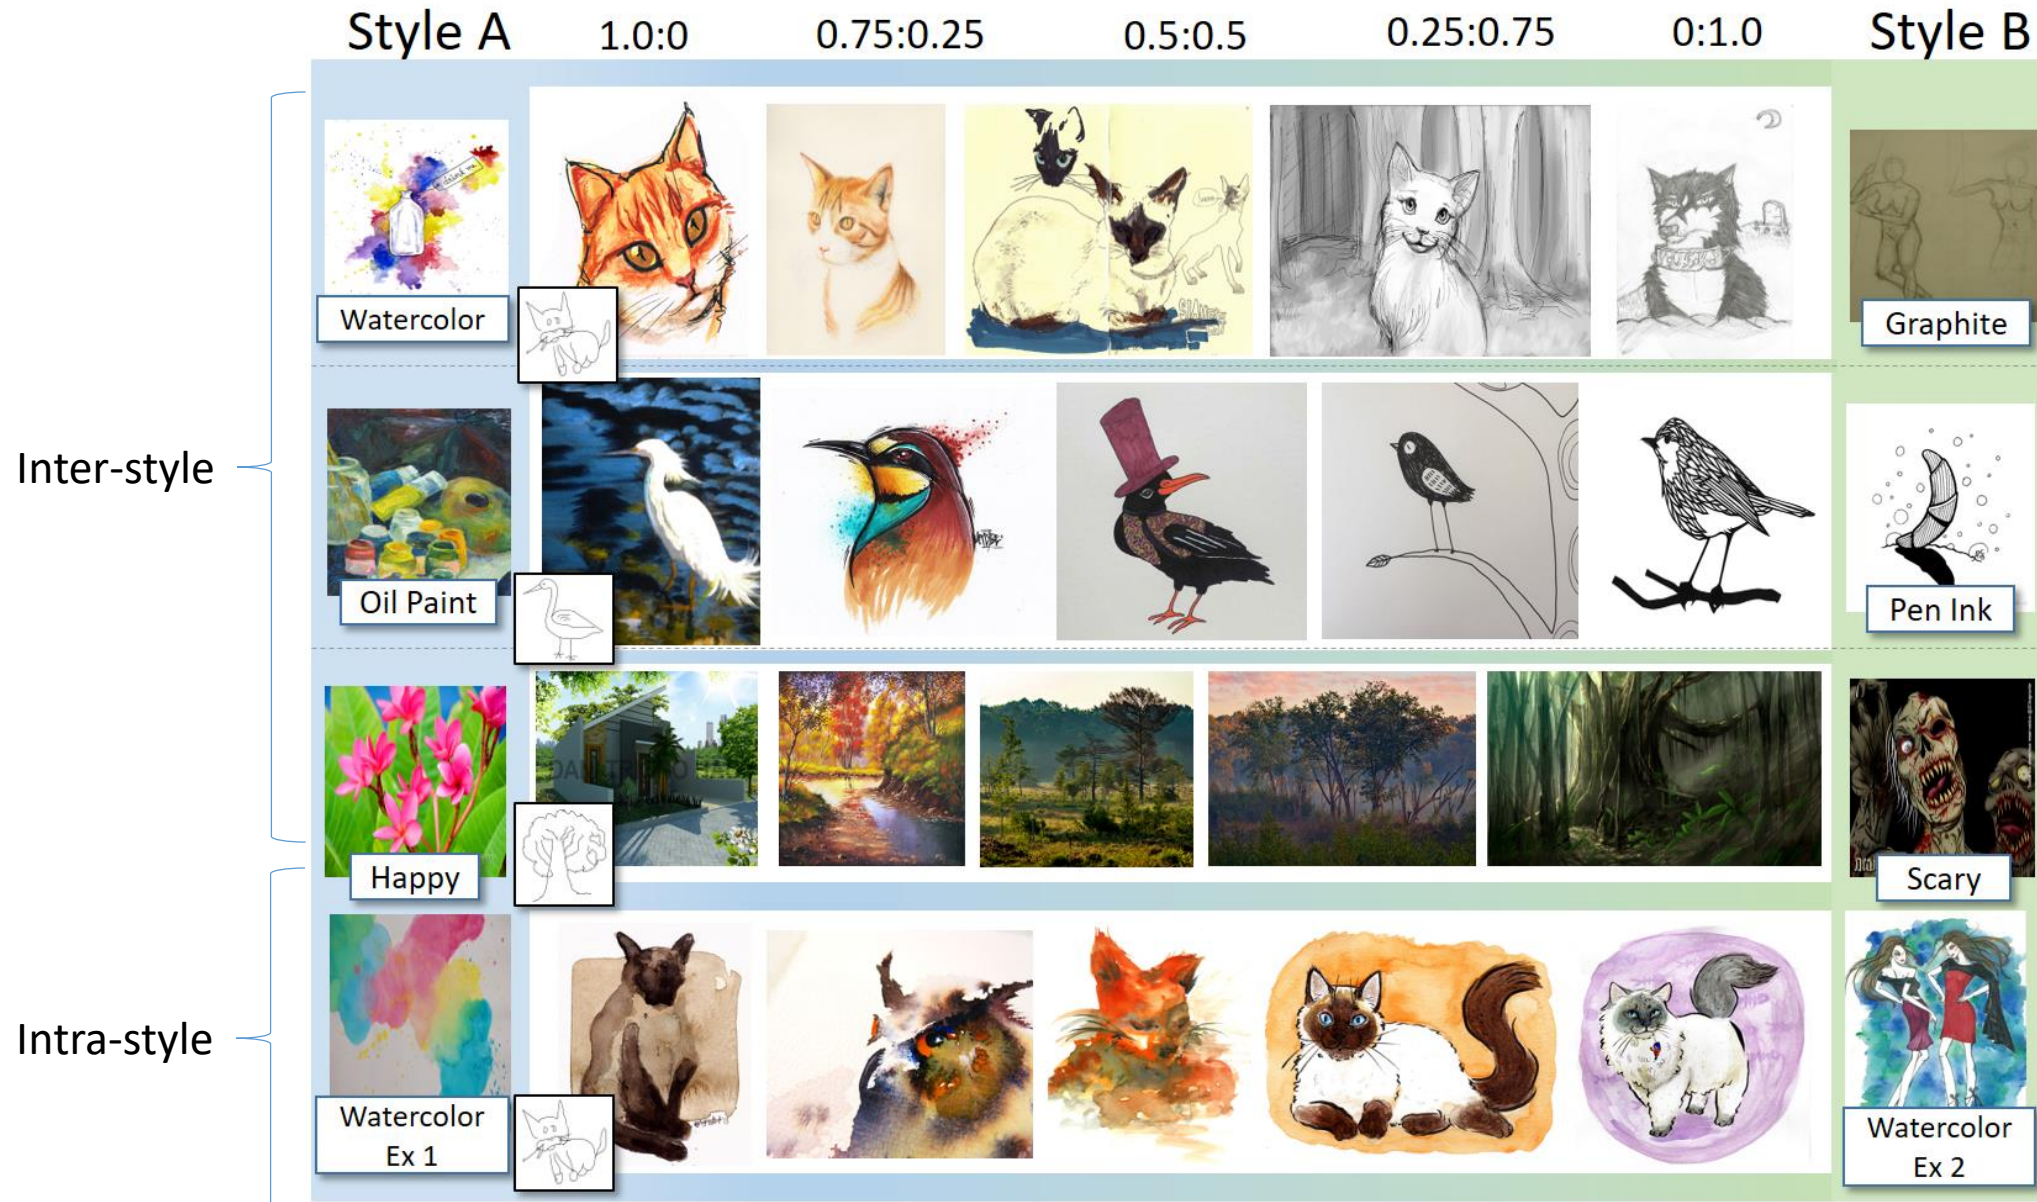

Supplement: Supplementary file 1 [file Collomosse_Sketching_With_Style_ICCV_2017_supplemental.zip › paper_1166_supplmentary_results.pdf]
