# Supplementary material
Source: ML conference proceedings conference paper supplement (https://openaccess.thecvf.com/content/ICCV_2017/html/Collomosse_Sketching_With_Style_ICCV_2017_paper.html)
Supplement: Supplementary file 1 [file Collomosse_Sketching_With_Style_ICCV_2017_supplemental.zip]

Archive with 2 entries (2 files):
- paper_1166_search_Video.wmv
- paper_1166_supplmentary_results.pdf
